# Supplementary material for: A molecular analysis of the toxicity of alkyltributylphosphonium chlorides in Aspergillus nidulans
Source: Royal Society of Chemistry journal article supplement (doi:10.1039/c3nj00167a), 2013-01-01
Supplement: c3nj00167a.pdf [file c3nj00167a.pdf]

## Electronic Supplementary Information

### **A molecular analysis of the toxicity of alkyltributylphosphonium chlorides in *Aspergillus nidulans***

Diego O. Hartmann<sup>a</sup> and Cristina Silva Pereira<sup>a\*</sup>

<sup>a</sup>Instituto de Tecnologia Química e Biológica, Universidade Nova de Lisboa, Av. da  
República, 2780-157, Oeiras, Portugal

\*Corresponding author: [spereira@itqb.unl.pt](mailto:spereira@itqb.unl.pt)

**Table 1.** List of the designed *qRT-PCR* oligonucleotides (forward and reverse) used in this study. The selected genes are involved in plasma membrane and cell wall biosynthesis, and in the cell wall integrity pathway of *Aspergillus nidulans*.  $\gamma$ -actin (*actA*) and  $\beta$ -tubulin (*tubC*) genes were selected as housekeeping (internal control).

| Name                                      | Gene (Code)           | Sequence (5' to 3')     | Source                |
|-------------------------------------------|-----------------------|-------------------------|-----------------------|
| <i>Plasma membrane biosynthetic genes</i> |                       |                         |                       |
| HMGR1f                                    | <i>HMGR1</i> (AN3817) | AAGCACTCCATGTCATGGCTA   | This study            |
| HMGR1r                                    | <i>HMGR1</i> (AN3817) | TAATAGCCTCAGCCACAACCTGA | This study            |
| AN9407F                                   | <i>fasA</i> (AN9407)  | CTTCAAAGCAAGGTCTTCCTGA  | This study            |
| AN9407R                                   | <i>fasA</i> (AN9407)  | CGCCAGGGACTCAATCACA     | This study            |
| barAf                                     | <i>barA</i> (AN4332)  | GTGGTGCTCAACCTGATGGA    | This study            |
| barAr                                     | <i>barA</i> (AN4332)  | TGGGTACATGATATGGCGTGA   | This study            |
| lagAf                                     | <i>lagA</i> (AN2464)  | TCCCCACAGAGAGCACGAA     | This study            |
| lagAr                                     | <i>lagA</i> (AN2464)  | GATGATGTGGTGGCCCACA     | This study            |
| <i>Cell wall biosynthetic genes</i>       |                       |                         |                       |
| gfaA2f                                    | <i>gfaA</i> (AN10709) | CCGTTTCGAGACTGAGACAGA   | This study            |
| gfaA2r                                    | <i>gfaA</i> (AN10709) | GATCAGGAGGCCGAAAGCA     | This study            |
| chsBf                                     | <i>chsB</i> (AN2523)  | CTTGAACGTTTACGCCTTCAGC  | Fujioka <i>et al.</i> |
| chsBr                                     | <i>chsB</i> (AN2523)  | TCGTCCAGACTCTTCTCTTCC   | Fujioka <i>et al.</i> |
| fksAf                                     | <i>fksA</i> (AN3729)  | CTCAGCAGACTTCGTCATTGG   | Fujioka <i>et al.</i> |
| fksAr                                     | <i>fksA</i> (AN3729)  | CAGAATAGCGAAACGGACCAC   | Fujioka <i>et al.</i> |
| agsBf                                     | <i>agsB</i> (AN3307)  | ATCGGACACTACCTTCCCTG    | Fujioka <i>et al.</i> |
| agsBr                                     | <i>agsB</i> (AN3307)  | GACTTGGCTGACGATCAACG    | Fujioka <i>et al.</i> |
| <i>Cell wall integrity pathway genes</i>  |                       |                         |                       |
| AN5660F                                   | <i>wscA</i> (AN5660)  | GGATGCGCGAAATGAGCAA     | This study            |
| AN5660R                                   | <i>wscA</i> (AN5660)  | GGCAGAGAAATCTCGGTCA     | This study            |
| mpkAf                                     | <i>mpkA</i> (AN5666)  | GACATCCGTCCAGACACTCA    | Fujioka <i>et al.</i> |
| mpkAr                                     | <i>mpkA</i> (AN5666)  | AGTAAAGATGAGGTGTCGTCGA  | Fujioka <i>et al.</i> |
| <i>Housekeeping genes</i>                 |                       |                         |                       |
| ACTF                                      | <i>actA</i> (AN6542)  | CTGGGACGACATGGAGAAGAT   | This study            |
| ACTR                                      | <i>actA</i> (AN6542)  | GTAGATGGGGACGACGTGAG    | This study            |
| TUBCF                                     | <i>tubC</i> (AN6838)  | TGGATCCCCAACAACGTCCA    | This study            |
| TUBCR                                     | <i>tubC</i> (AN6838)  | CTCAGCCTCAGTGAACCTCCA   | This study            |

T. Fujioka, O. Mizutani, K. Furukawa, N. Sato, A. Yoshimi, Y. Yamagata, T. Nakajima and K. Abe, *Eukaryot. Cell*, 2007, **6**, 1497-1510.
